# Supplementary material for: The Usage of Antibiotics by COVID-19 Patients with Comorbidities: The Risk of Increased Antimicrobial Resistance
Source: Antibiotics (Basel). 2021 Dec 29;11(1):35. doi: 10.3390/antibiotics11010035 (PMC8772884; doi:10.3390/antibiotics11010035)
Supplement: Supplementary file 1 [file antibiotics-11-00035-s001.zip › antibiotics-1522524-supplementary.pdf]

## Supplementary Materials

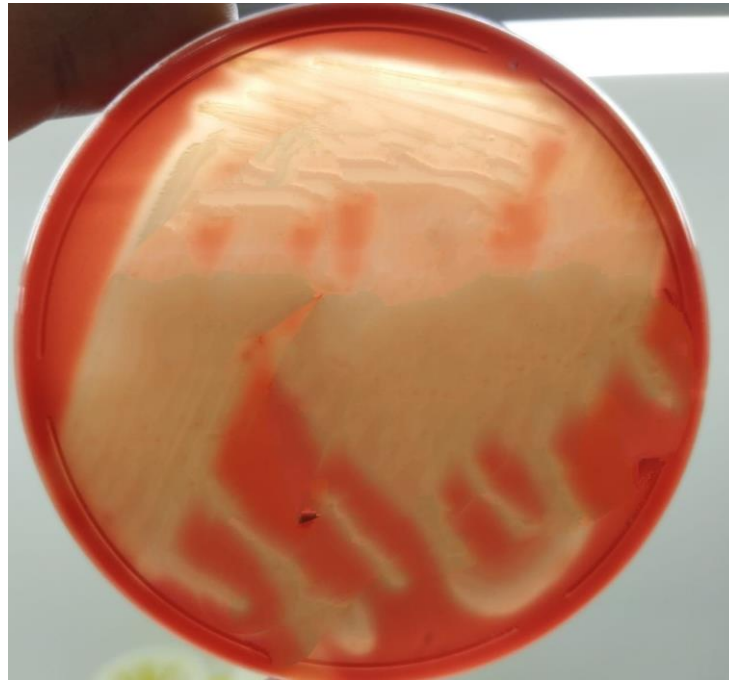

**Figure S1.** Clear beta Hemolysis by *Streptococcus*.

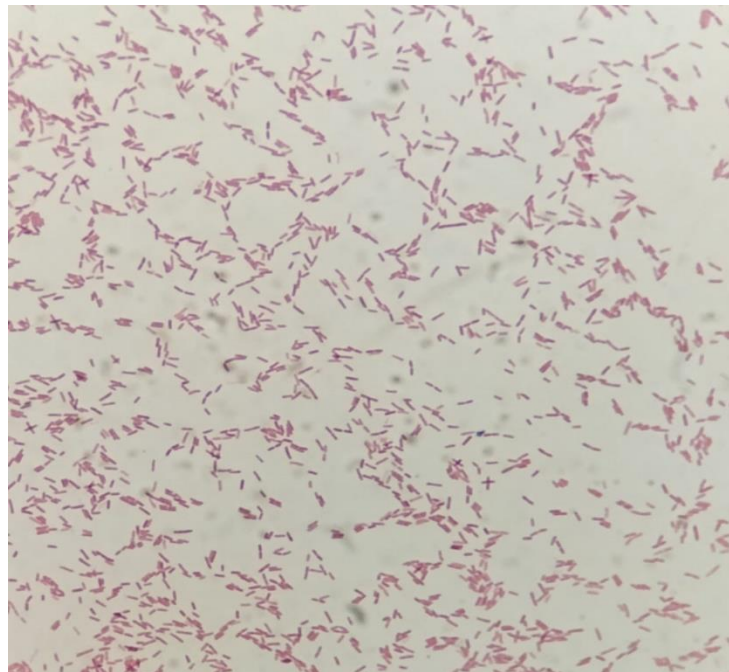

**Figure S2.** Gram stain showing Gram-Negative bacteria.

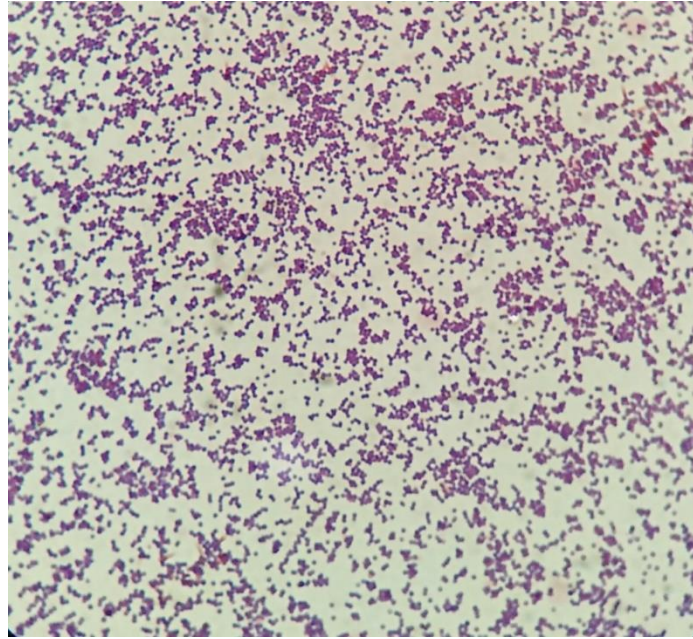

**Figure S3.** Gram Stain showing Gram-Positive Bacteria.

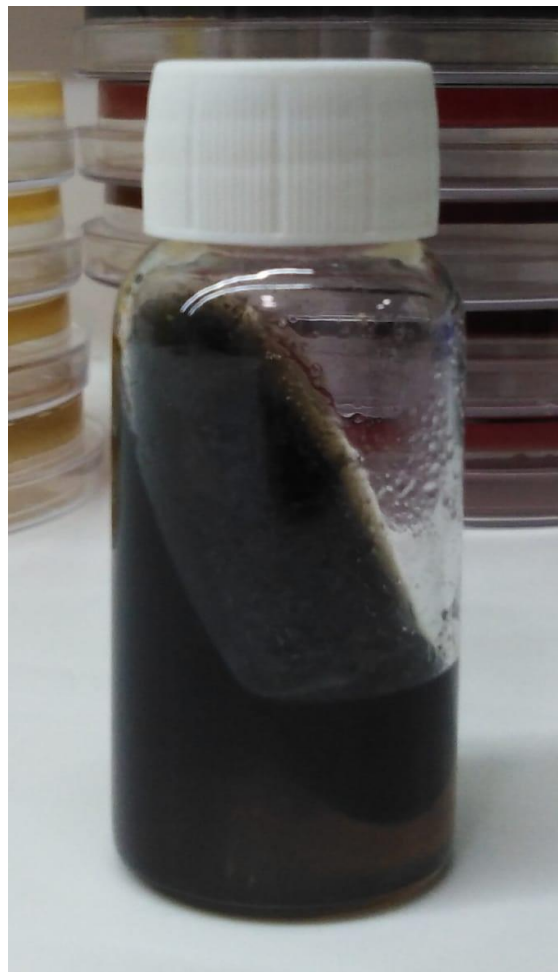

**Figure S4.** A positive Bile Esculine Reaction (blackening of media).

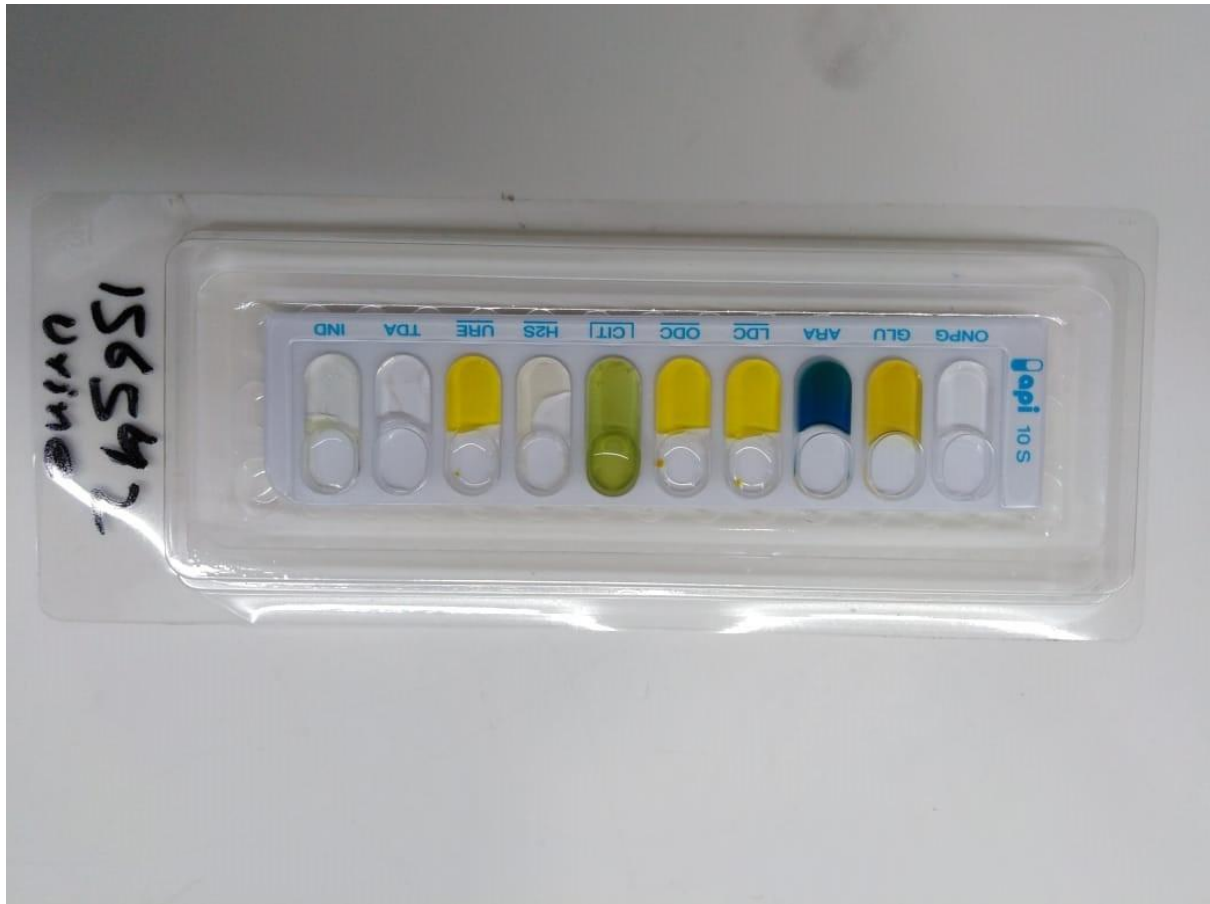

Figure S5. Result of *E. coli* on API.
